# Supplementary material
Source: ML conference proceedings conference paper supplement (https://www.ecva.net/papers/eccv_2020/papers_ECCV/html/123540732_ECCV_2020_paper.php)
Supplement: Supplementary file 2 [file 123540732-supp.zip]

# Supplementary Material for Pyramid Multi-view Stereo Net with Self-adaptive View Aggregation

Hongwei Yi<sup>1\*</sup>, Zizhuang Wei<sup>1\*</sup>, Mingyu Ding<sup>2</sup>, Runze Zhang<sup>3</sup>, Yisong Chen<sup>1</sup>,  
Guoping Wang<sup>1</sup>, and Yu-Wing Tai<sup>4</sup>

<sup>1</sup> PKU {hongweiyi, weizizhuang, chenysisong, wgp}@pku.edu.cn

<sup>2</sup> HKU myding@cs.hku.hk

<sup>3</sup> Tencent ryanrzzhang@tencent.com

<sup>4</sup> Kwai Inc. yuwing@gmail.com

## 1 Network Architecture

The network details of **2D U-Net** and **3D U-Net** in **VA-MVSNet** are described in Table 1.

## 2 More Reconstruction Results

This section presents all the reconstructions results on *DTU* [1] *evaluation* dataset in Fig. 1 and *Tanks and Temples* [20] in Fig. 2. PVA-MVSNet is able to reconstruct dense, accurate and complete point clouds on *DTU* [1] dataset and shows strong generalization on all scenes in *Tanks and Temples* [20].

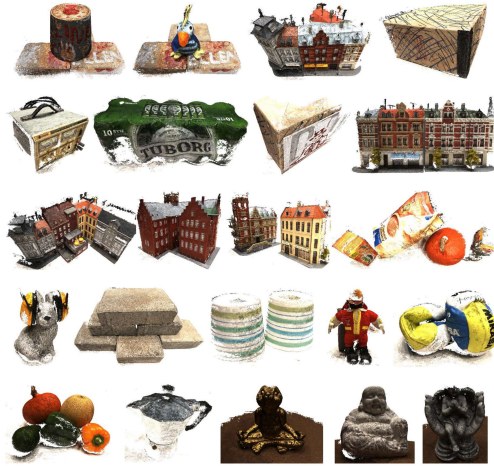

Fig. 1. Reconstruction results on DTU [1] evaluation set.

---

\* Equal Contribution

| Input                                                       | Layer Description                                  | Output                | Output Size                     |
|-------------------------------------------------------------|----------------------------------------------------|-----------------------|---------------------------------|
| Input multi-view image size: $N \times H \times W \times 3$ |                                                    |                       |                                 |
| 2D U-Net                                                    |                                                    |                       |                                 |
| $I_{i=0 \dots N-1}$                                         | ConvGR, filter= $3 \times 3$ , stride=2            | 2D1.0                 | $H \times W \times 16$          |
| 2D0.0                                                       | ConvGR, filter= $3 \times 3$ , stride=2            | 2D2.0                 | $H \times W \times 32$          |
| 2D0.1                                                       | ConvGR, filter= $3 \times 3$ , stride=2            | 2D3.0                 | $H \times W \times 64$          |
| 2D0.2                                                       | ConvGR, filter= $3 \times 3$ , stride=2            | 2D4.0                 | $H \times W \times 128$         |
| $I_{i=0 \dots N-1}$                                         | ConvGR, filter= $3 \times 3$                       | 2D0.1                 | $H \times W \times 8$           |
| 2D0.1                                                       | ConvGR, filter= $3 \times 3$                       | 2D0.2                 | $H \times W \times 8$           |
| 2D1.0                                                       | ConvGR, filter= $3 \times 3$                       | 2D1.1                 | $H \times W \times 16$          |
| 2D1.1                                                       | ConvGR, filter= $3 \times 3$                       | 2D1.2                 | $H \times W \times 16$          |
| 2D2.0                                                       | ConvGR, filter= $3 \times 3$                       | 2D2.1                 | $H \times W \times 32$          |
| 2D2.1                                                       | ConvGR, filter= $3 \times 3$                       | 2D2.2                 | $H \times W \times 32$          |
| 2D3.0                                                       | ConvGR, filter= $3 \times 3$                       | 2D3.1                 | $H \times W \times 64$          |
| 2D3.1                                                       | ConvGR, filter= $3 \times 3$                       | 2D3.2                 | $H \times W \times 64$          |
| 2D4.0                                                       | ConvGR, filter= $3 \times 3$                       | 2D4.1                 | $H \times W \times 128$         |
| 2D4.1                                                       | ConvGR, filter= $3 \times 3$                       | 2D4.2                 | $H \times W \times 128$         |
| 2D4.2                                                       | DeConvGR, filter= $3 \times 3$ , stride=2          | 2D5.0                 | $H \times W \times 64$          |
| [2D5.0, 2D3.2]                                              | ConvGR, filter= $3 \times 3$                       | 2D5.1                 | $H \times W \times 64$          |
| 2D5.1                                                       | ConvGR, filter= $3 \times 3$                       | 2D5.2                 | $H \times W \times 64$          |
| 2D5.2                                                       | DeConvGR, filter= $3 \times 3$ , stride=2          | 2D6.0                 | $H \times W \times 32$          |
| [2D6.0, 2D2.2]                                              | ConvGR, filter= $3 \times 3$                       | 2D6.1                 | $H \times W \times 32$          |
| 2D6.1                                                       | ConvGR, filter= $3 \times 3$                       | 2D6.2                 | $H \times W \times 32$          |
| 2D6.2                                                       | DeConvGR, filter= $3 \times 3$ , stride=2          | 2D7.0                 | $H \times W \times 16$          |
| [2D7.0, 2D1.2]                                              | ConvGR, filter= $3 \times 3$                       | 2D7.1                 | $H \times W \times 16$          |
| 2D7.1                                                       | ConvGR, filter= $3 \times 3$                       | 2D7.2                 | $H \times W \times 16$          |
| 2D7.2                                                       | DeConvGR, filter= $3 \times 3$ , stride=2          | 2D8.0                 | $H \times W \times 8$           |
| [2D8.0, 2D0.2]                                              | ConvGR, filter= $3 \times 3$                       | 2D8.1                 | $H \times W \times 8$           |
| 2D8.1                                                       | ConvGR, filter= $3 \times 3$                       | 2D8.2                 | $H \times W \times 8$           |
| 2D8.2                                                       | ConvGR, filter= $5 \times 5$ , stride=2, padding=2 | 2D9.0                 | $H \times W \times 16$          |
| 2D9.0                                                       | ConvGR, filter= $3 \times 3$                       | 2D9.1                 | $H \times W \times 16$          |
| 2D9.1                                                       | ConvGR, filter= $3 \times 3$                       | 2D9.2                 | $H \times W \times 16$          |
| 2D9.2                                                       | ConvGR, filter= $5 \times 5$ , stride=2, padding=2 | 2D10.0                | $H \times W \times 32$          |
| 2D10.0                                                      | ConvGR, filter= $3 \times 3$                       | 2D10.1                | $H \times W \times 32$          |
| 2D10.1                                                      | Conv, filter= $3 \times 3$                         | $\{F_i\}_{i=0}^{N-1}$ | $H \times W \times 32$          |
| 3D U-Net                                                    |                                                    |                       |                                 |
| $\mathcal{C}$                                               | Conv3DGR, filter= $3 \times 3$                     | 3D0                   | $D \times H \times W \times 8$  |
| $\mathcal{C}$                                               | Conv3DGR, filter= $3 \times 3$ , stride=2          | 3D1                   | $D \times H \times W \times 16$ |
| 3D1                                                         | Conv3DGR, filter= $3 \times 3$ , stride=2          | 3D3                   | $D \times H \times W \times 32$ |
| 3D1                                                         | Conv3DGR, filter= $3 \times 3$                     | 3D2                   | $D \times H \times W \times 16$ |
| 3D3                                                         | Conv3DGR, filter= $3 \times 3$                     | 3D4                   | $D \times H \times W \times 32$ |
| 3D3                                                         | Conv3DGR, filter= $3 \times 3$ , stride=2          | 3D5                   | $D \times H \times W \times 64$ |
| 3D5                                                         | Conv3DGR, filter= $3 \times 3$                     | 3D6                   | $D \times H \times W \times 64$ |
| 3D6                                                         | DeConv3DGR, filter= $3 \times 3$ , stride=2        | 3D7                   | $D \times H \times W \times 32$ |
| 3D7+3D4                                                     | DeConv3DGR, filter= $3 \times 3$ , stride=2        | 3D8                   | $D \times H \times W \times 16$ |
| 3D8+3D2                                                     | DeConv3DGR, filter= $3 \times 3$ , stride=2        | 3D9                   | $D \times H \times W \times 8$  |
| 3D9+3D0                                                     | Conv3D, filter= $1 \times 1$                       | $\mathcal{P}$         | $D \times H \times W \times 1$  |

**Table 1.** The network details of 2D U-Net and 3D U-Net in VA-MVSNet. We denote Conv, DeConv, Conv3D, DeConv3D as 2D convolutional filter, 2D deconvolutional filter, 3D convolutional filter, 3D deconvolutional filter and use GR to represent the abbreviation of group normalization and the Relu. ‘+’ and ‘[]’ represent the element-wise addition operation and concatenation. N, H, W, D denote input view number, image height, image height and depth hypothesis number.

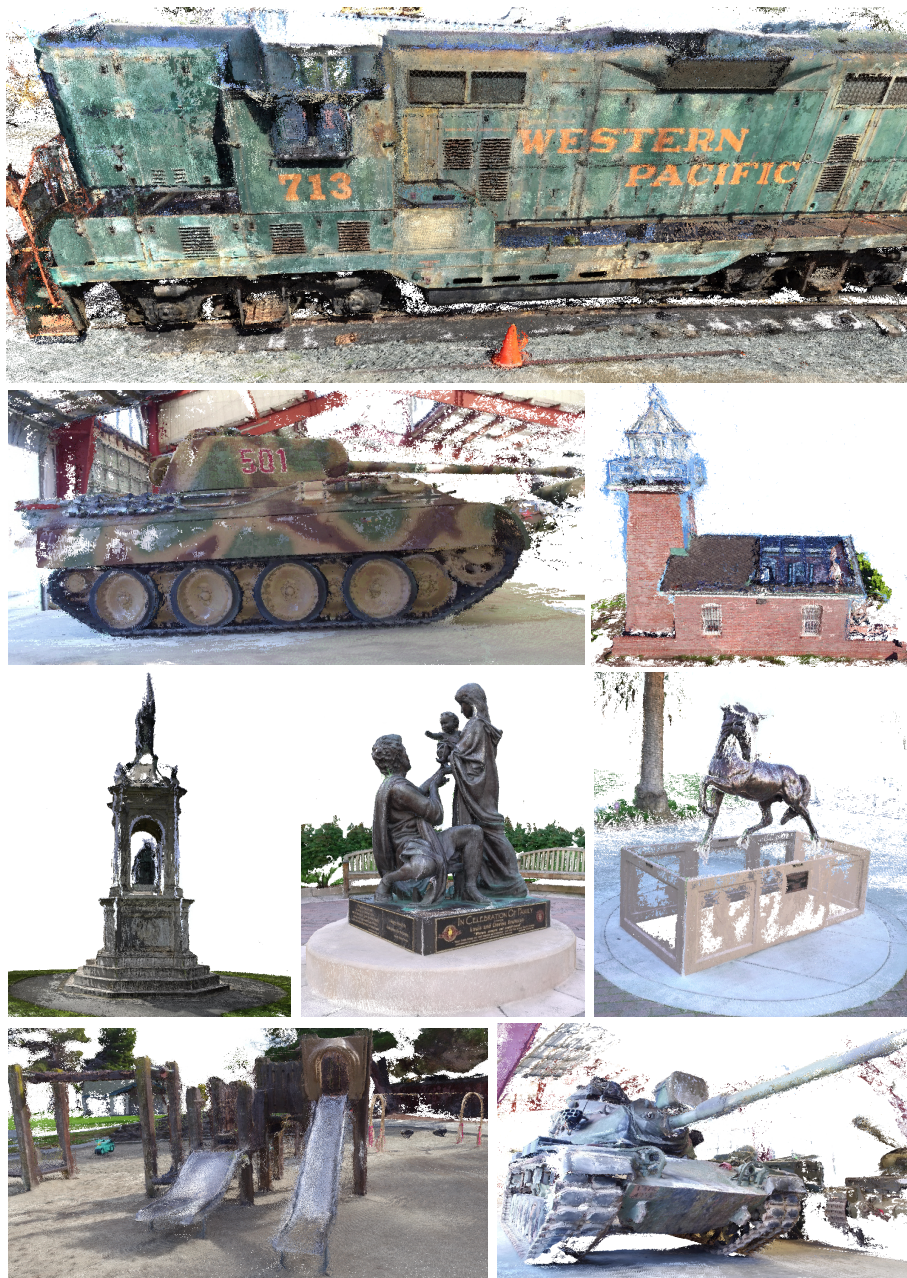

**Fig. 2.** Point cloud reconstruction results on *Tanks and Temples* [20] benchmark.
